# Supplementary material for: Collinearity and Dimensionality Reduction in Radiomics: Effect of Preprocessing Parameters in Hypertrophic Cardiomyopathy Magnetic Resonance T1 and T2 Mapping
Source: MDPI journal article supplement (doi:10.3390/bioengineering10010080), 2023-01-06
Supplement: s1 [file s1]

## Supplementary Material

### Collinearity and dimensionality reduction in radiomics: effect of preprocessing parameters in hypertrophic cardiomyopathy magnetic resonance T1 and T2 mapping

Chiara Marzi<sup>1</sup>, Daniela Marfisi<sup>2</sup>, Andrea Barucci<sup>1</sup>, Jacopo Del Meglio<sup>3</sup>, Alessio Lilli<sup>3</sup>, Claudio Vignali<sup>4</sup>, Mario Mascalchi<sup>5</sup>, Giancarlo Casolo<sup>3</sup>, Stefano Diciotti<sup>6</sup>, Antonio Claudio Traino<sup>2</sup>, Carlo Tessa<sup>7,‡</sup> and Marco Giannelli<sup>2,‡,\*</sup>

<sup>1</sup> Institute of Applied Physics "Nello Carrara" (IFAC), Council of National Research (CNR), Sesto Fiorentino, Florence, Italy

<sup>2</sup> Unit of Medical Physics, Pisa University Hospital "Azienda Ospedaliero-Universitaria Pisana", Via Roma 67, 56126, Pisa, Italy

<sup>3</sup> Unit of Cardiology, Azienda USL Toscana Nord Ovest, Versilia Hospital, 55041 Lido di Camaiore, Italy.

<sup>4</sup> Unit of Radiology, Azienda USL Toscana Nord Ovest, Versilia Hospital, 55041 Lido di Camaiore, Italy.

<sup>5</sup> Department of Experimental and Clinical Biomedical Sciences "Mario Serio", University of Florence, 50121, Florence, Italy.

<sup>6</sup> Department of Electrical, Electronic, and Information Engineering "Guglielmo Marconi", University of Bologna, 47522, Cesena, Italy.

<sup>7</sup> Unit of Radiology, Azienda USL Toscana Nord Ovest, Apuane Hospital, 54100, Massa, Italy

\* Correspondence: m.giannelli@ao-pisa.toscana.it.

‡ These authors contributed equally to this work.

**Table S1.** Matching between numerical label, used in supplementary figures, and radiomic feature name, in accordance with PyRadiomics (<https://pyradiomics.readthedocs.io/en/latest/features.html>). No shape features were included in our analysis in case of filtering.

| # for original maps | # for filtered maps | Radiomic features             |
|---------------------|---------------------|-------------------------------|
| 0                   | NA                  | shape2D_Elongation            |
| 1                   | NA                  | shape2D_MajorAxisLength       |
| 2                   | NA                  | shape2D_MaximumDiameter       |
| 3                   | NA                  | shape2D_MeshSurface           |
| 4                   | NA                  | shape2D_MinorAxisLength       |
| 5                   | NA                  | shape2D_Perimeter             |
| 6                   | NA                  | shape2D_PerimeterSurfaceRatio |
| 7                   | NA                  | shape2D_PixelSurface          |
| 8                   | NA                  | shape2D_Sphericity            |
| 9                   | 0                   | firstorder_Mean               |
| 10                  | 1                   | firstorder_Variance           |
| 11                  | 2                   | firstorder_Skewness           |
| 12                  | 3                   | firstorder_Kurtosis           |
| 13                  | 4                   | firstorder_Median             |
| 14                  | 5                   | firstorder_Minimum            |
| 15                  | 6                   | firstorder_10Percentile       |
| 16                  | 7                   | firstorder_90Percentile       |

|    |    |                                        |
|----|----|----------------------------------------|
| 17 | 8  | firstorder_Maximum                     |
| 18 | 9  | firstorder_InterquartileRange          |
| 19 | 10 | firstorder_MeanAbsoluteDeviation       |
| 20 | 11 | firstorder_RobustMeanAbsoluteDeviation |
| 21 | 12 | firstorder_Energy                      |
| 22 | 13 | firstorder_RootMeanSquared             |
| 23 | 14 | firstorder_Entropy                     |
| 24 | 15 | firstorder_Uniformity                  |
| 25 | 16 | glcm_MaximumProbability                |
| 26 | 17 | glcm_JointAverage                      |
| 27 | 18 | glcm_SumSquares                        |
| 28 | 19 | glcm_JointEntropy                      |
| 29 | 20 | glcm_DifferenceAverage                 |
| 30 | 21 | glcm_DifferenceVariance                |
| 31 | 22 | glcm_DifferenceEntropy                 |
| 32 | 23 | glcm_SumEntropy                        |
| 33 | 24 | glcm_JointEnergy                       |
| 34 | 25 | glcm_Contrast                          |
| 35 | 26 | glcm_Id                                |
| 36 | 27 | glcm_Idn                               |
| 37 | 28 | glcm_Idm                               |
| 38 | 29 | glcm_Idmn                              |
| 39 | 30 | glcm_InverseVariance                   |
| 40 | 31 | glcm_Correlation                       |
| 41 | 32 | glcm_Autocorrelation                   |
| 42 | 33 | glcm_ClusterTendency                   |
| 43 | 34 | glcm_ClusterShade                      |
| 44 | 35 | glcm_ClusterProminence                 |
| 45 | 36 | glcm_Imc1                              |
| 46 | 37 | glcm_Imc2                              |
| 47 | 38 | glrlm_GrayLevelNonUniformity           |
| 48 | 39 | glrlm_GrayLevelNonUniformityNormalized |
| 49 | 40 | glrlm_GrayLevelVariance                |
| 50 | 41 | glrlm_HighGrayLevelRunEmphasis         |
| 51 | 42 | glrlm_LongRunEmphasis                  |
| 52 | 43 | glrlm_LongRunHighGrayLevelEmphasis     |
| 53 | 44 | glrlm_LongRunLowGrayLevelEmphasis      |
| 54 | 45 | glrlm_LowGrayLevelRunEmphasis          |
| 55 | 46 | glrlm_RunEntropy                       |
| 56 | 47 | glrlm_RunLengthNonUniformity           |
| 57 | 48 | glrlm_RunLengthNonUniformityNormalized |
| 58 | 49 | glrlm_RunPercentage                    |

|    |    |                                           |
|----|----|-------------------------------------------|
| 59 | 50 | glrlm_RunVariance                         |
| 60 | 51 | glrlm_ShortRunEmphasis                    |
| 61 | 52 | glrlm_ShortRunHighGrayLevelEmphasis       |
| 62 | 53 | glrlm_ShortRunLowGrayLevelEmphasis        |
| 63 | 54 | glszm_GrayLevelNonUniformity              |
| 64 | 55 | glszm_GrayLevelNonUniformityNormalized    |
| 65 | 56 | glszm_GrayLevelVariance                   |
| 66 | 57 | glszm_HighGrayLevelZoneEmphasis           |
| 67 | 58 | glszm_LargeAreaEmphasis                   |
| 68 | 59 | glszm_LargeAreaHighGrayLevelEmphasis      |
| 69 | 60 | glszm_LargeAreaLowGrayLevelEmphasis       |
| 70 | 61 | glszm_LowGrayLevelZoneEmphasis            |
| 71 | 62 | glszm_SizeZoneNonUniformity               |
| 72 | 63 | glszm_SizeZoneNonUniformityNormalized     |
| 73 | 64 | glszm_SmallAreaEmphasis                   |
| 74 | 65 | glszm_SmallAreaHighGrayLevelEmphasis      |
| 75 | 66 | glszm_SmallAreaLowGrayLevelEmphasis       |
| 76 | 67 | glszm_ZoneEntropy                         |
| 77 | 68 | glszm_ZonePercentage                      |
| 78 | 69 | glszm_ZoneVariance                        |
| 79 | 70 | ngtdm_Busyness                            |
| 80 | 71 | ngtdm_Coarseness                          |
| 81 | 72 | ngtdm_Complexity                          |
| 82 | 73 | ngtdm_Contrast                            |
| 83 | 74 | ngtdm_Strength                            |
| 84 | 75 | gldm_DependenceEntropy                    |
| 85 | 76 | gldm_DependenceNonUniformity              |
| 86 | 77 | gldm_DependenceNonUniformityNormalized    |
| 87 | 78 | gldm_DependenceVariance                   |
| 88 | 79 | gldm_GrayLevelNonUniformity               |
| 89 | 80 | gldm_GrayLevelVariance                    |
| 90 | 81 | gldm_HighGrayLevelEmphasis                |
| 91 | 82 | gldm_LargeDependenceEmphasis              |
| 92 | 83 | gldm_LargeDependenceHighGrayLevelEmphasis |
| 93 | 84 | gldm_LargeDependenceLowGrayLevelEmphasis  |
| 94 | 85 | gldm_LowGrayLevelEmphasis                 |
| 95 | 86 | gldm_SmallDependenceEmphasis              |
| 96 | 87 | gldm_SmallDependenceHighGrayLevelEmphasis |
| 97 | 88 | gldm_SmallDependenceLowGrayLevelEmphasis  |

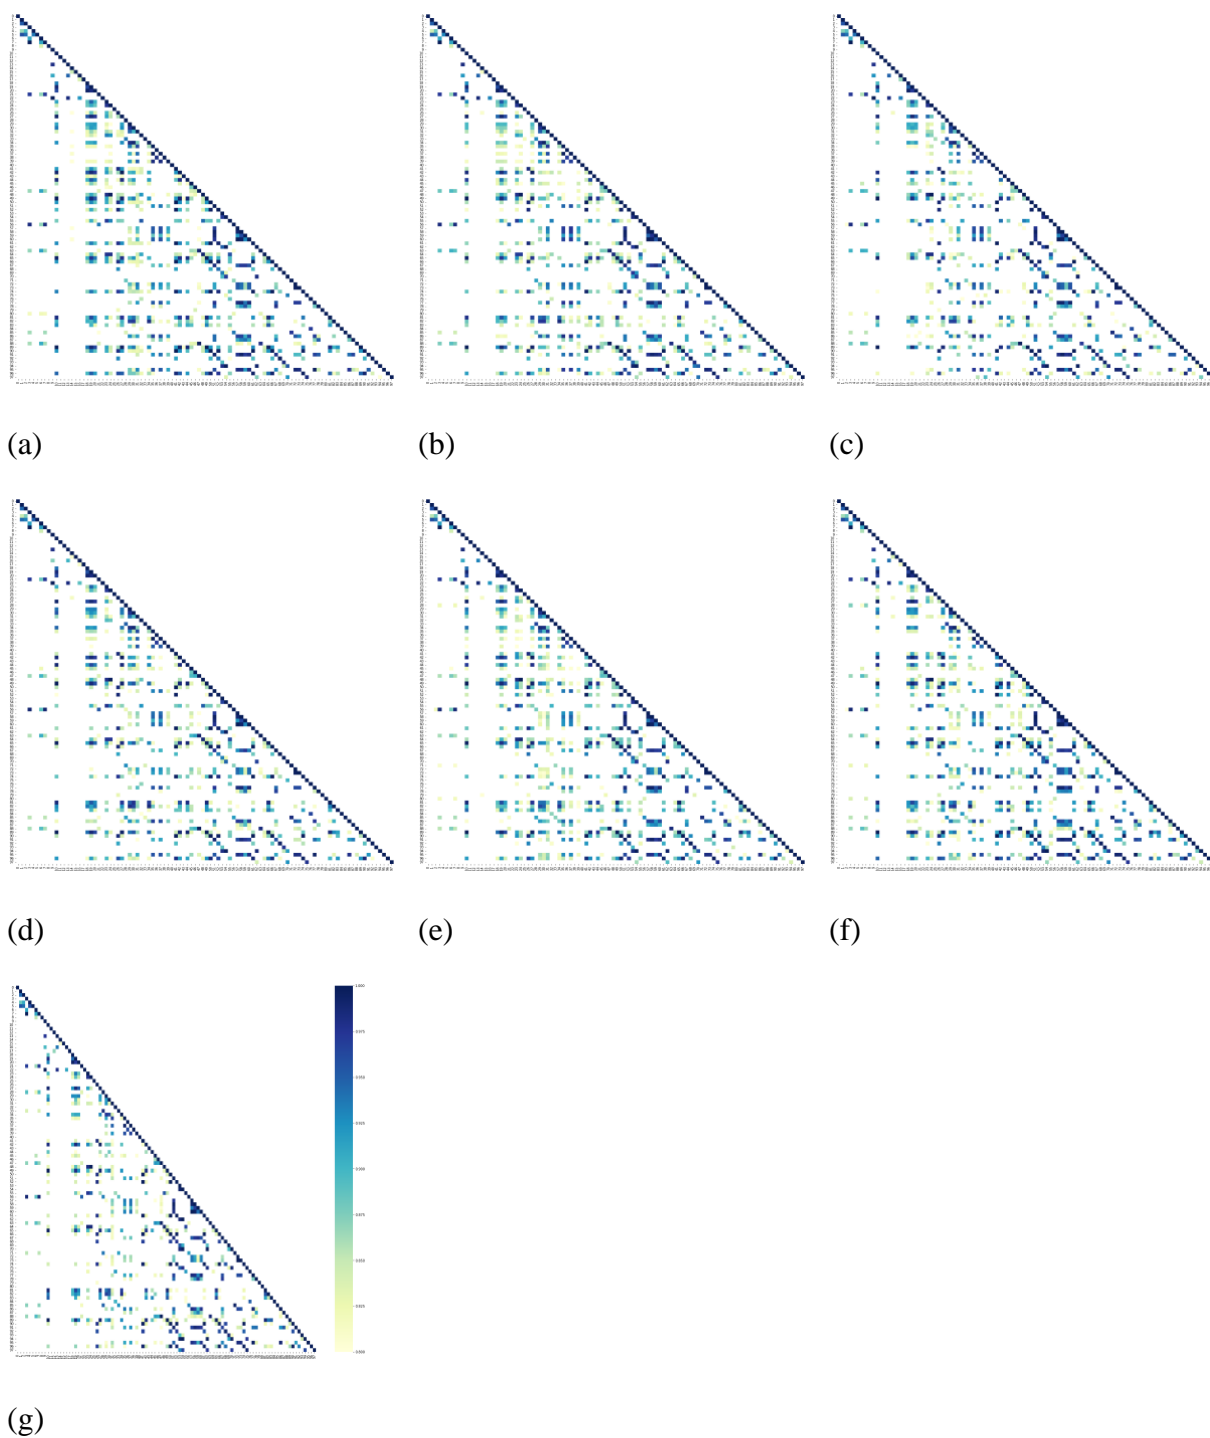

**Figure S1.** Examples of heatmaps of significant PCCs with absolute value greater than 0.8 for T1 maps, at fixed discretization bin width of 5.35 ms and resampling voxel size of 1.8 mm (S1a), 1.9 mm (S1b), 2.0 mm (S1c), 2.1 mm (S1d), 2.2 mm (S1e), 2.3 mm (S1f), and 2.4 mm (S1g). Numerical labels and related radiomic features are reported in Table S1.

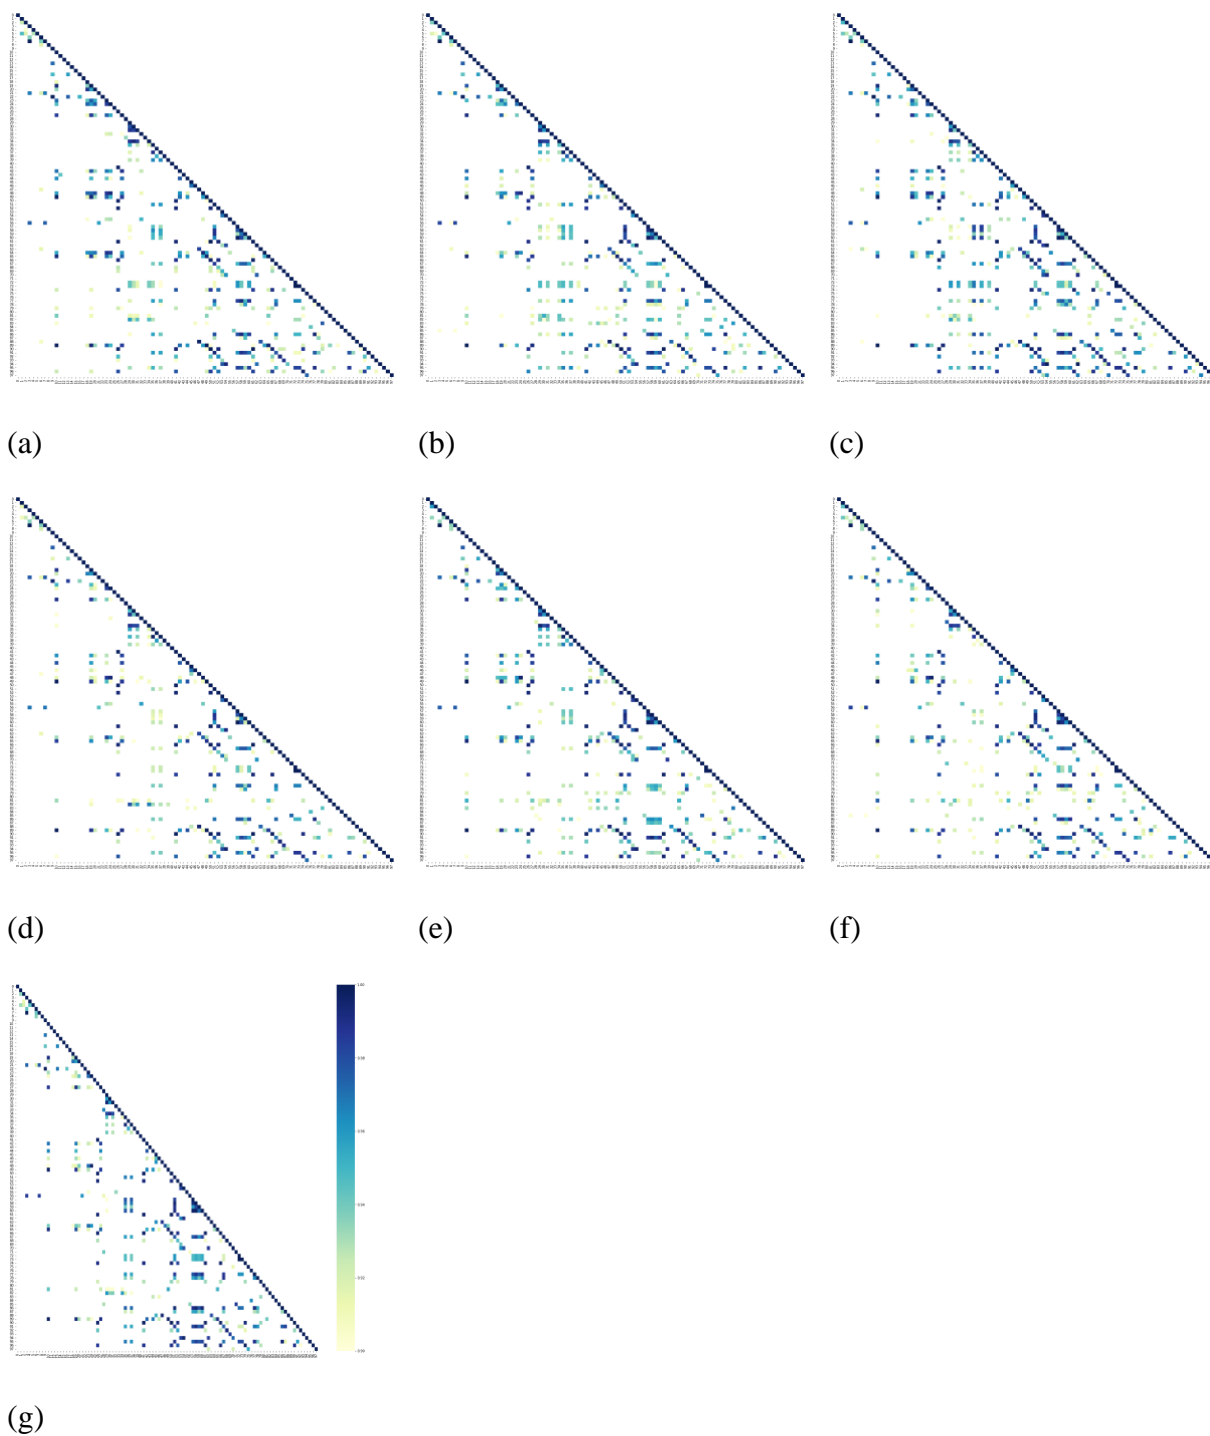

**Figure S2.** Examples of heatmaps of significant SCCs with absolute value greater than 0.9 for T1 maps, at fixed discretization bin width of 6.05 ms and resampling voxel size of 1.8 mm (S2a), 1.9 mm (S2b), 2.0 mm (S2c), 2.1 mm (S2d), 2.2 mm (S2e), 2.3 mm (S2f), and 2.4 mm (S2g). Numerical labels and related radiomic features are reported in Table S1.

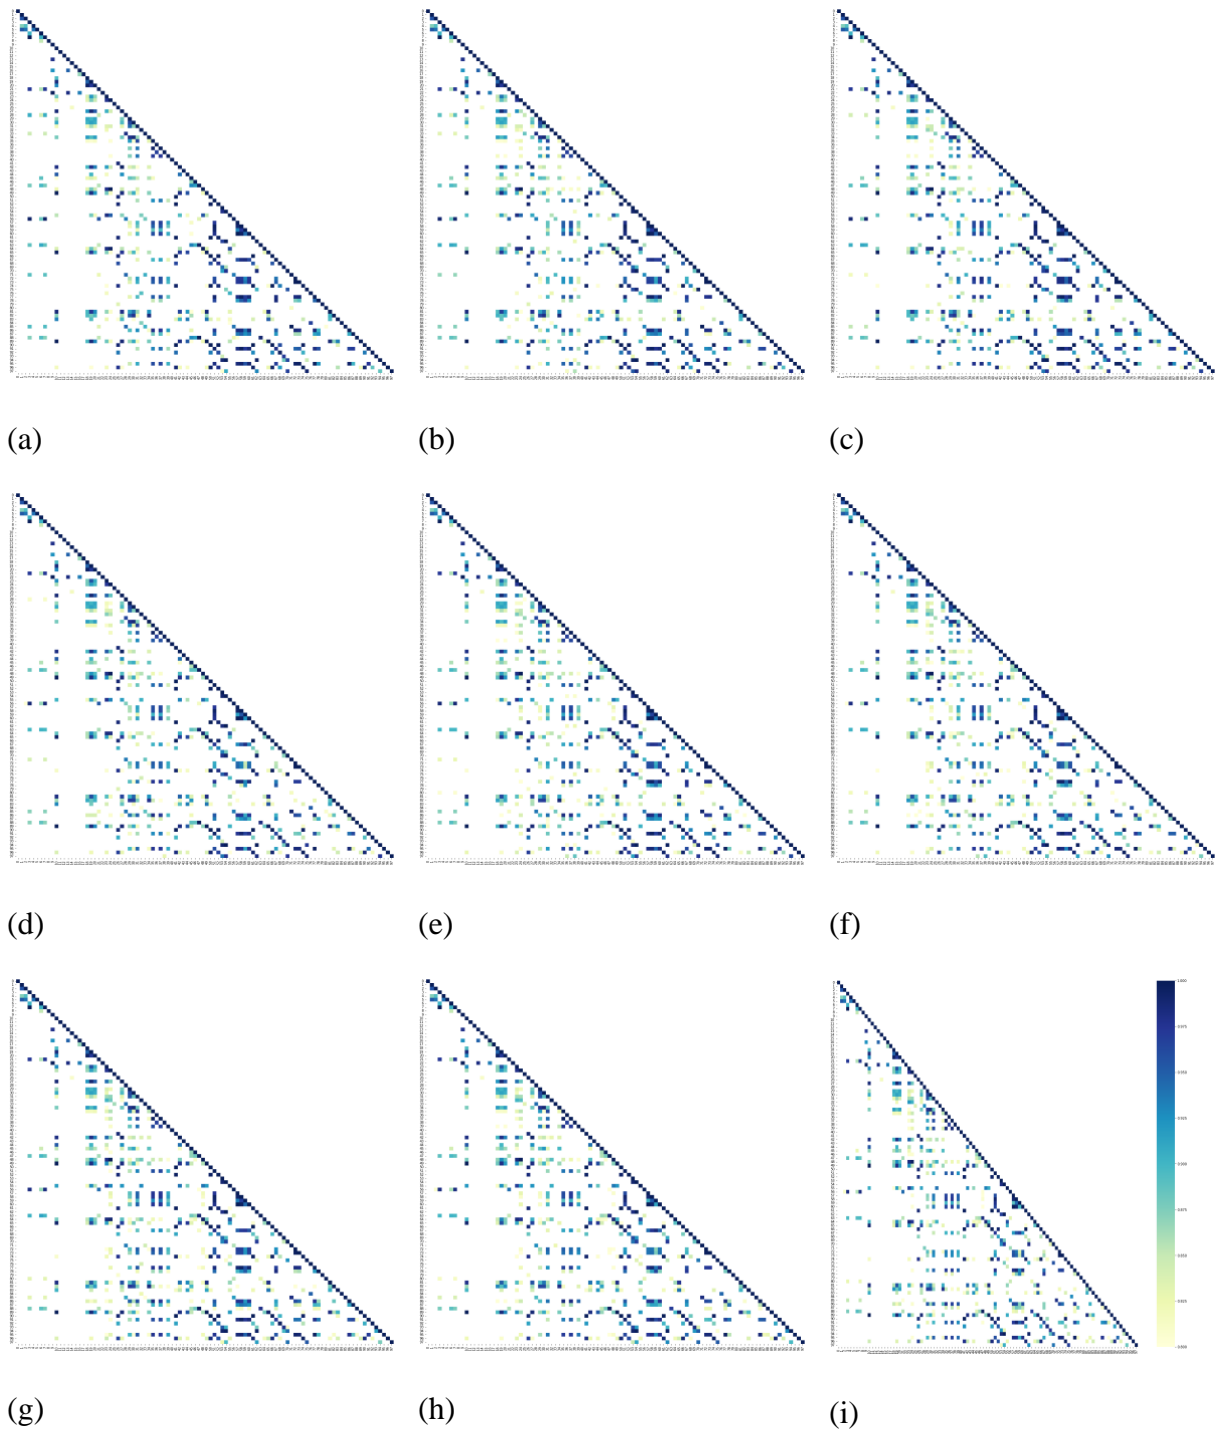

**Figure S3.** Examples of heatmaps of significant PCCs with absolute value greater than 0.8 for T1 maps, at fixed resampling voxel size of 2.0 mm and discretization bin width of 3.60 (S3a), 3.95 (S3b), 4.30 (S3c), 4.65 (S3d), 5.00 (S3e), 5.35 (S3f), 5.70 (S3g), 6.05 (S3h), and 6.40 (S3i). Numerical labels and related radiomic features are reported in Table S1.

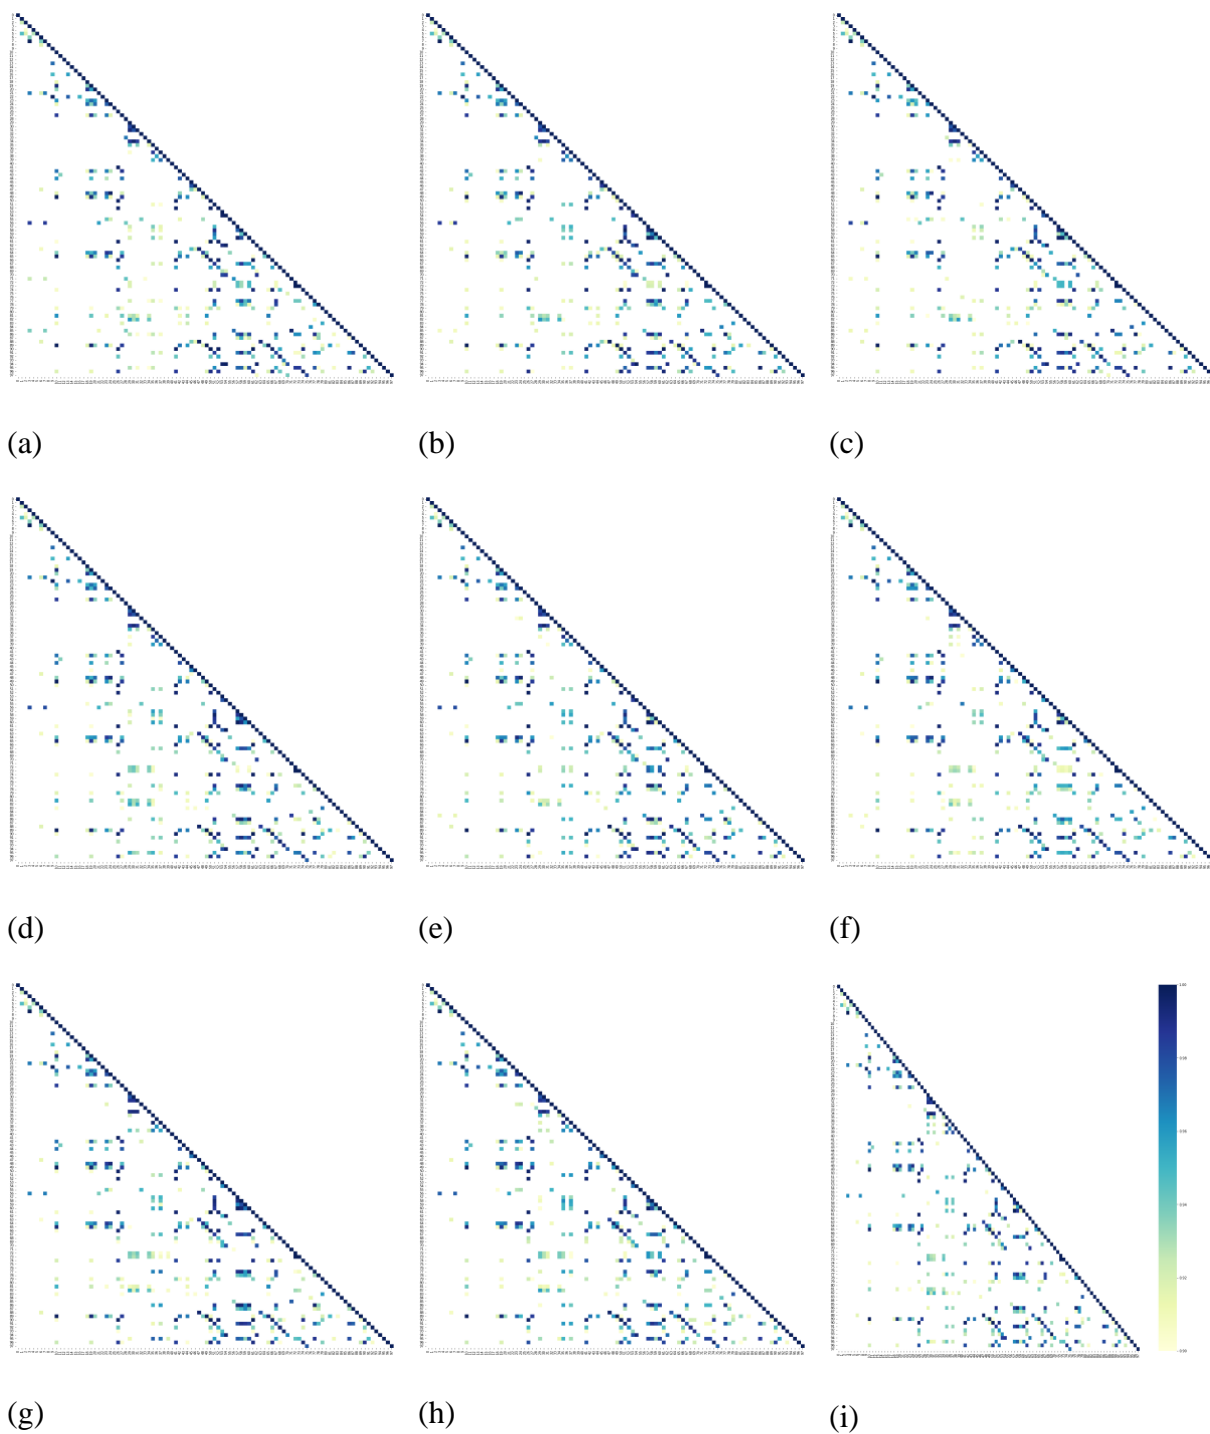

**Figure S4.** Examples of heatmaps of significant SCCs with absolute value greater than 0.9 for T1 maps, at fixed resampling voxel size of 1.8 mm and discretization bin width of 3.60 (S4a), 3.95 (S4b), 4.30 (S4c), 4.65 (S4d), 5.00 (S4e), 5.35 (S4f), 5.70 (S4g), 6.05 (S4h), and 6.40 (S4i). Numerical labels and related radiomic features are reported in Table S1.

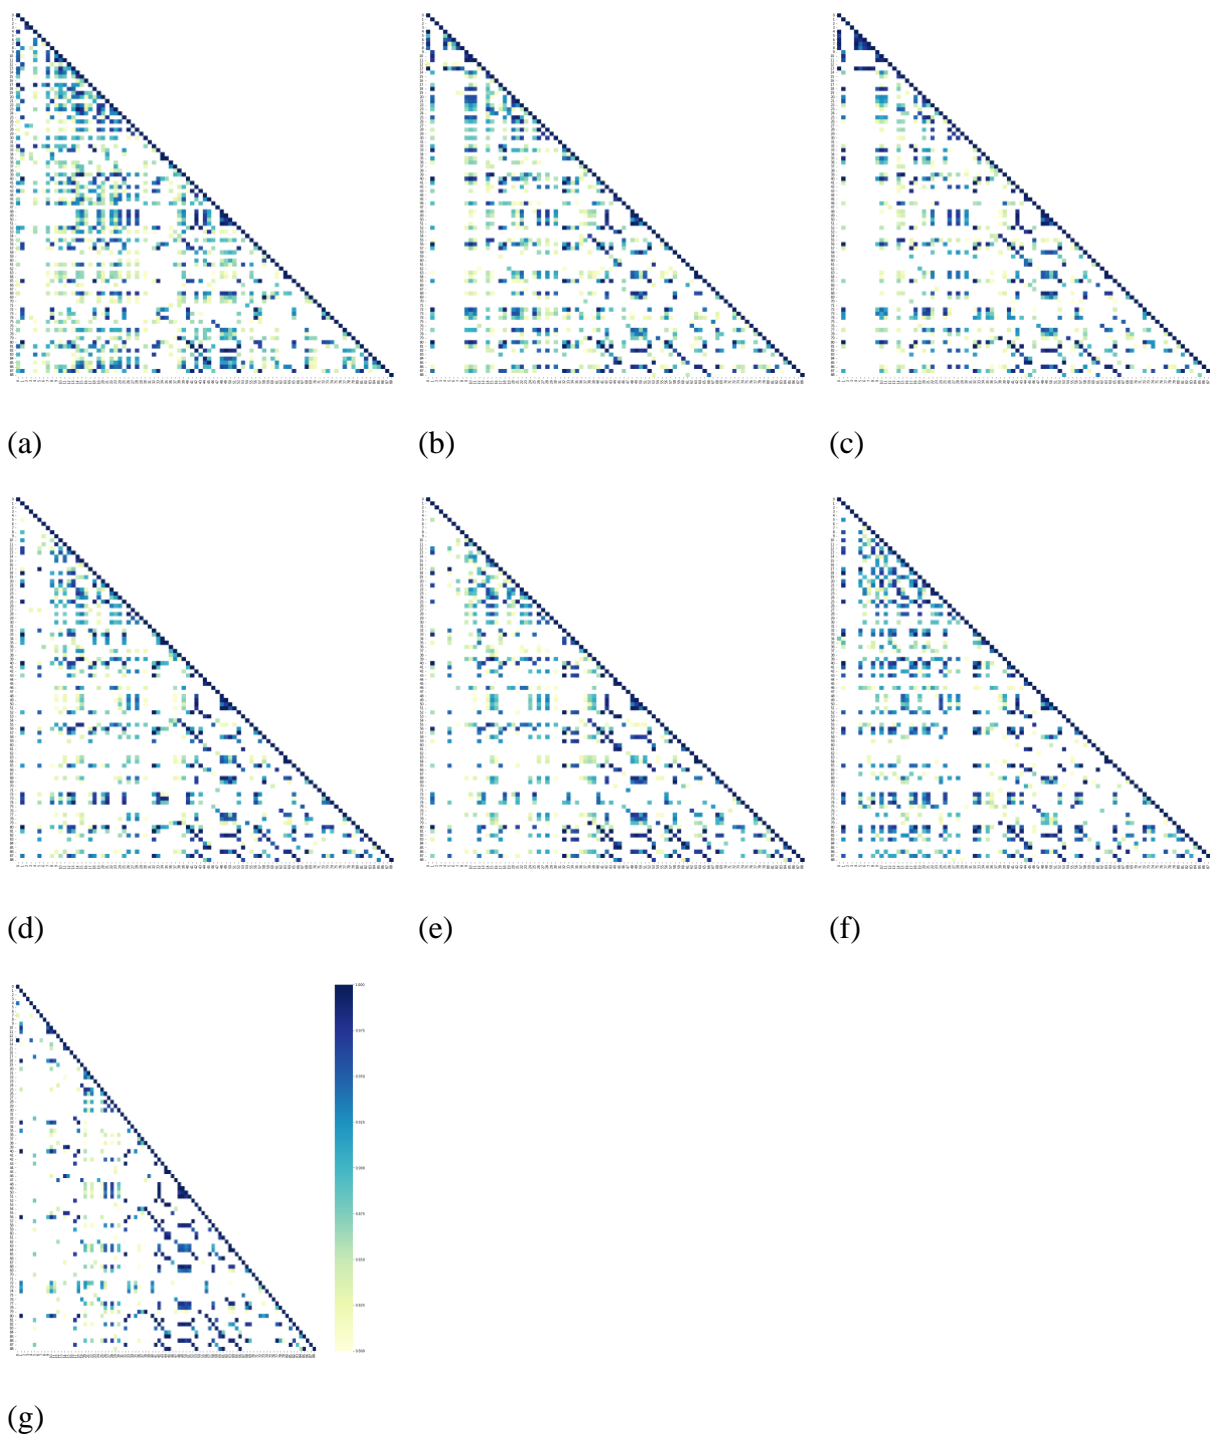

**Figure S5.** Heatmaps of significant PCCs with absolute value greater than 0.8 for T1 maps, at fixed resampling voxel size of 2.1 mm and discretization bin width of 6 ms, with varying filtering: gradient (S5a), square (S5b), square-root (S5c), wavelet-LH (S5d), wavelet-HL (S5e), wavelet-HH (S5f), and wavelet-LL (S5g). HH: horizontal and vertical high-pass filters, HL: horizontal high-pass filter and vertical low-pass filter, LH: horizontal low-pass filter and vertical high-pass filter, LL: horizontal and vertical low-pass filters. Numerical labels and related radiomic features are reported in Table S1.



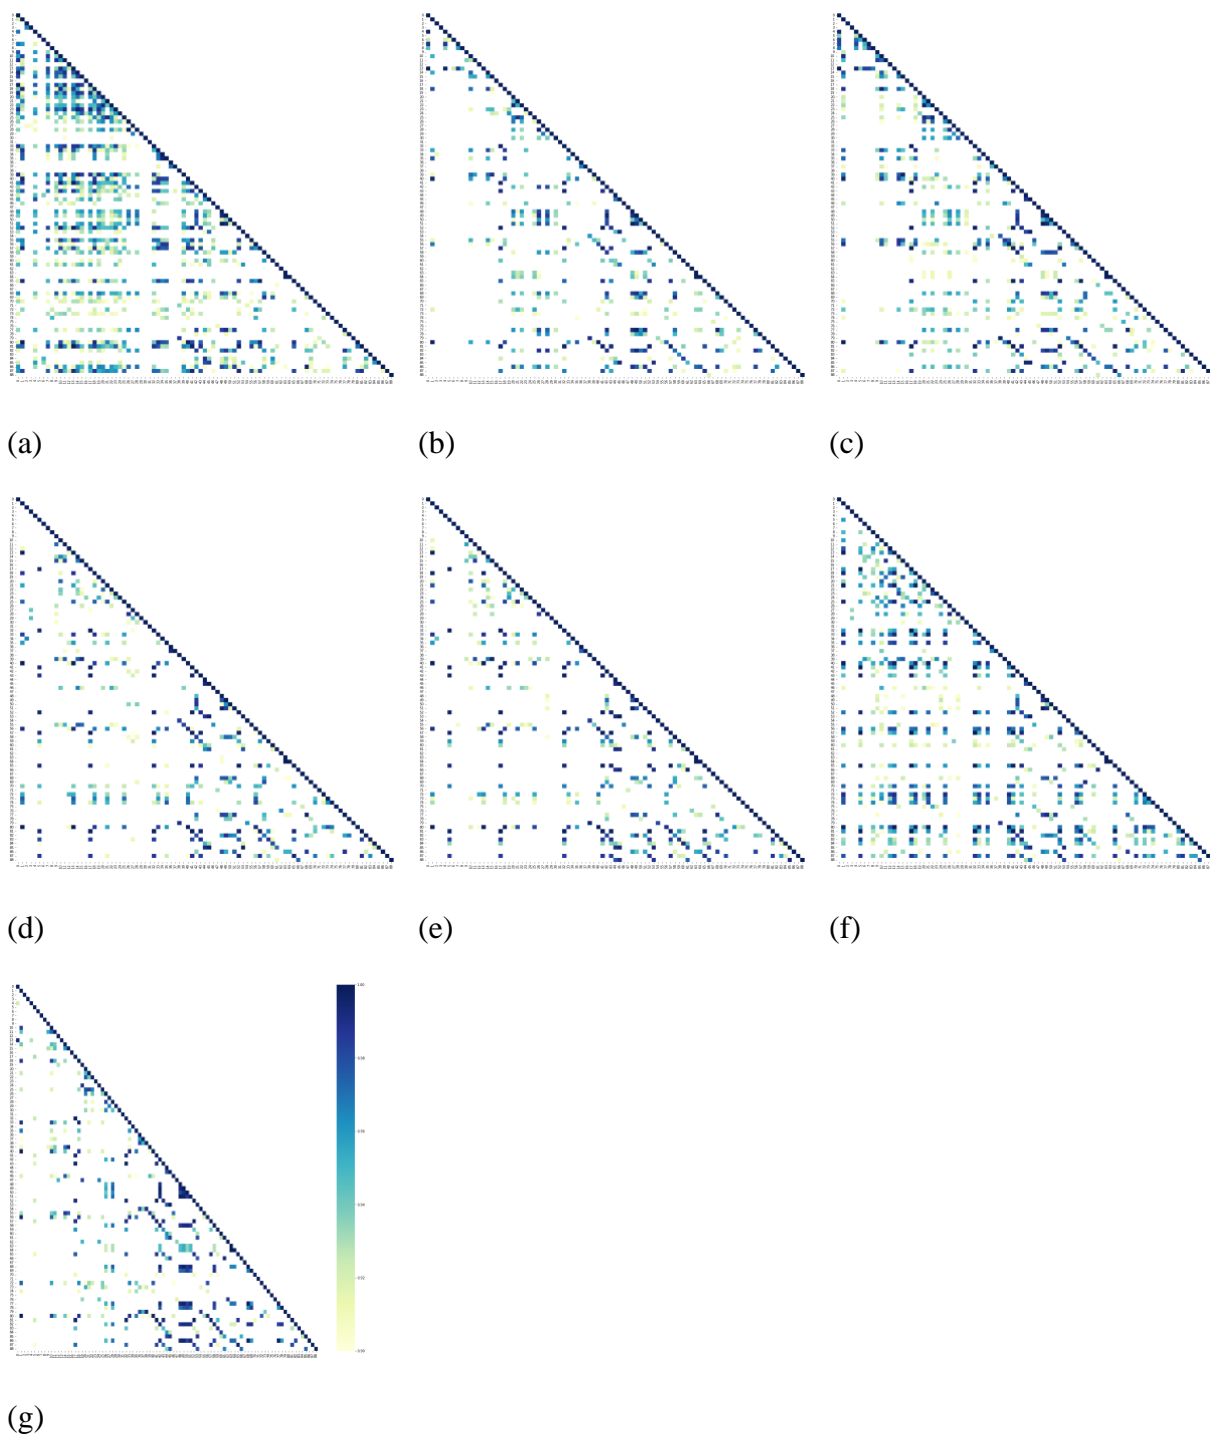

**Figure S6.** Heatmaps of significant SCCs with absolute value greater than 0.9 for T1 maps, at fixed resampling voxel size of 2.1 mm and discretization bin width of 6 ms, with varying filtering: gradient (S6a), square (S6b), square-root (S6c), wavelet-LH (S6d), wavelet-HL (S6e), wavelet-HH (S6f), and wavelet-LL (S6g). HH: horizontal and vertical high-pass filters, HL: horizontal high-pass filter and vertical low-pass filter, LH: horizontal low-pass filter and vertical high-pass filter, LL: horizontal and vertical low-pass filters. Numerical labels and related radiomic features are reported in Table S1.

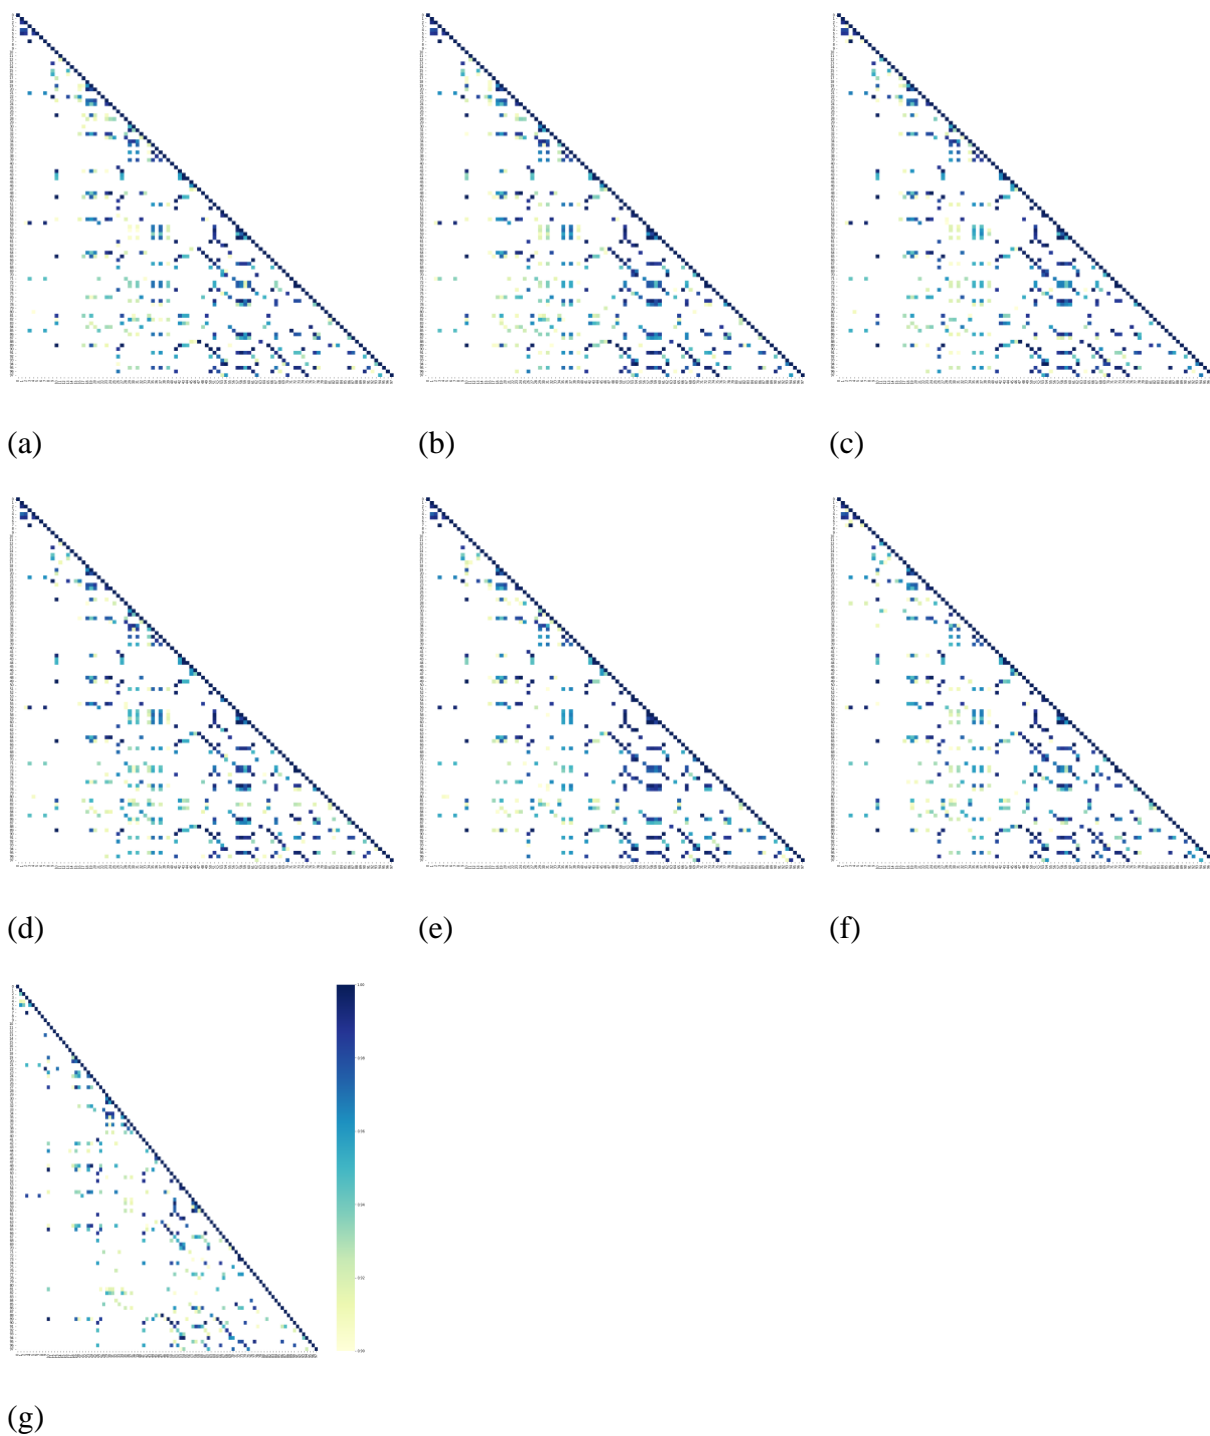

**Figure S7.** Examples of heatmaps of significant PCCs with absolute value greater than 0.8 for T2 maps, at fixed discretization bin width of 0.49 ms and resampling voxel size of 1.8 mm (S7a), 1.9 mm (S7b), 2.0 mm (S7c), 2.1 mm (S7d), 2.2 mm (S7e), 2.3 mm (S7f), and 2.4 mm (S7g). Numerical labels and related radiomic features are reported in Table S1.

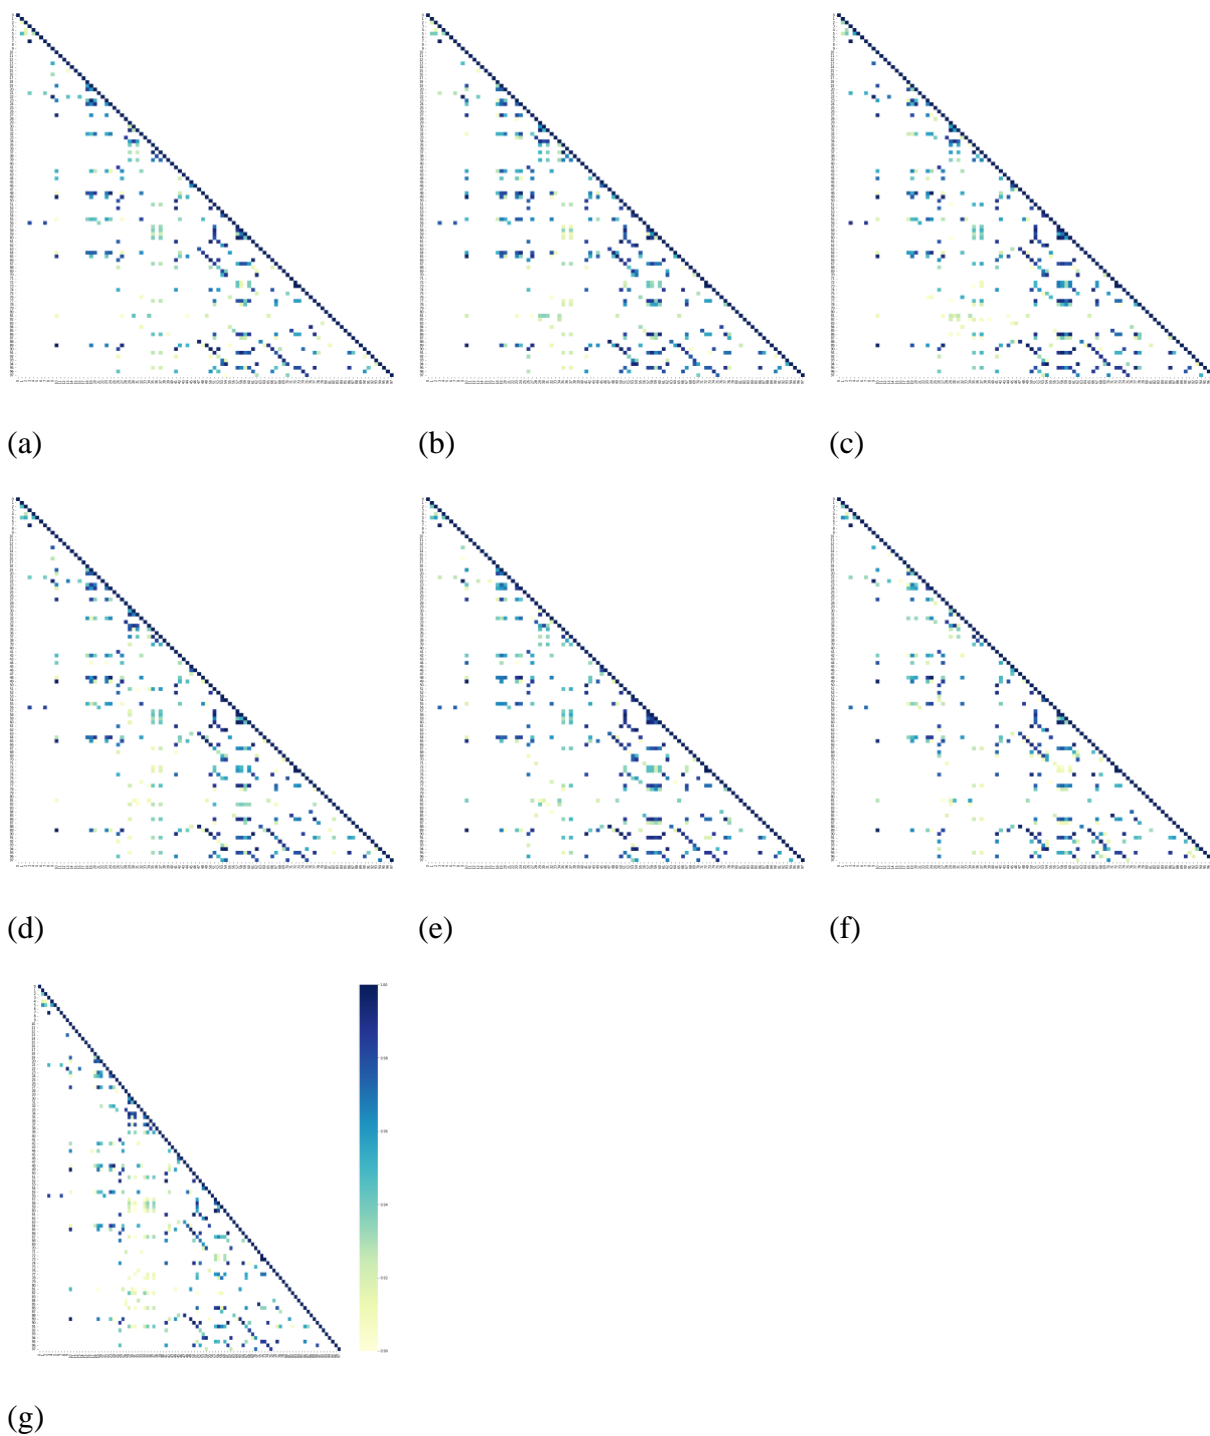

**Figure S8.** Examples of heatmaps of significant SCCs with absolute value greater than 0.9 for T2 maps, at fixed discretization bin width of 0.54 ms and resampling voxel size of 1.8 mm (S8a), 1.9 mm (S8b), 2.0 mm (S8c), 2.1 mm (S8d), 2.2 mm (S8e), 2.3 mm (S8f), and 2.4 mm (S8g). Numerical labels and related radiomic features are reported in Table S1.

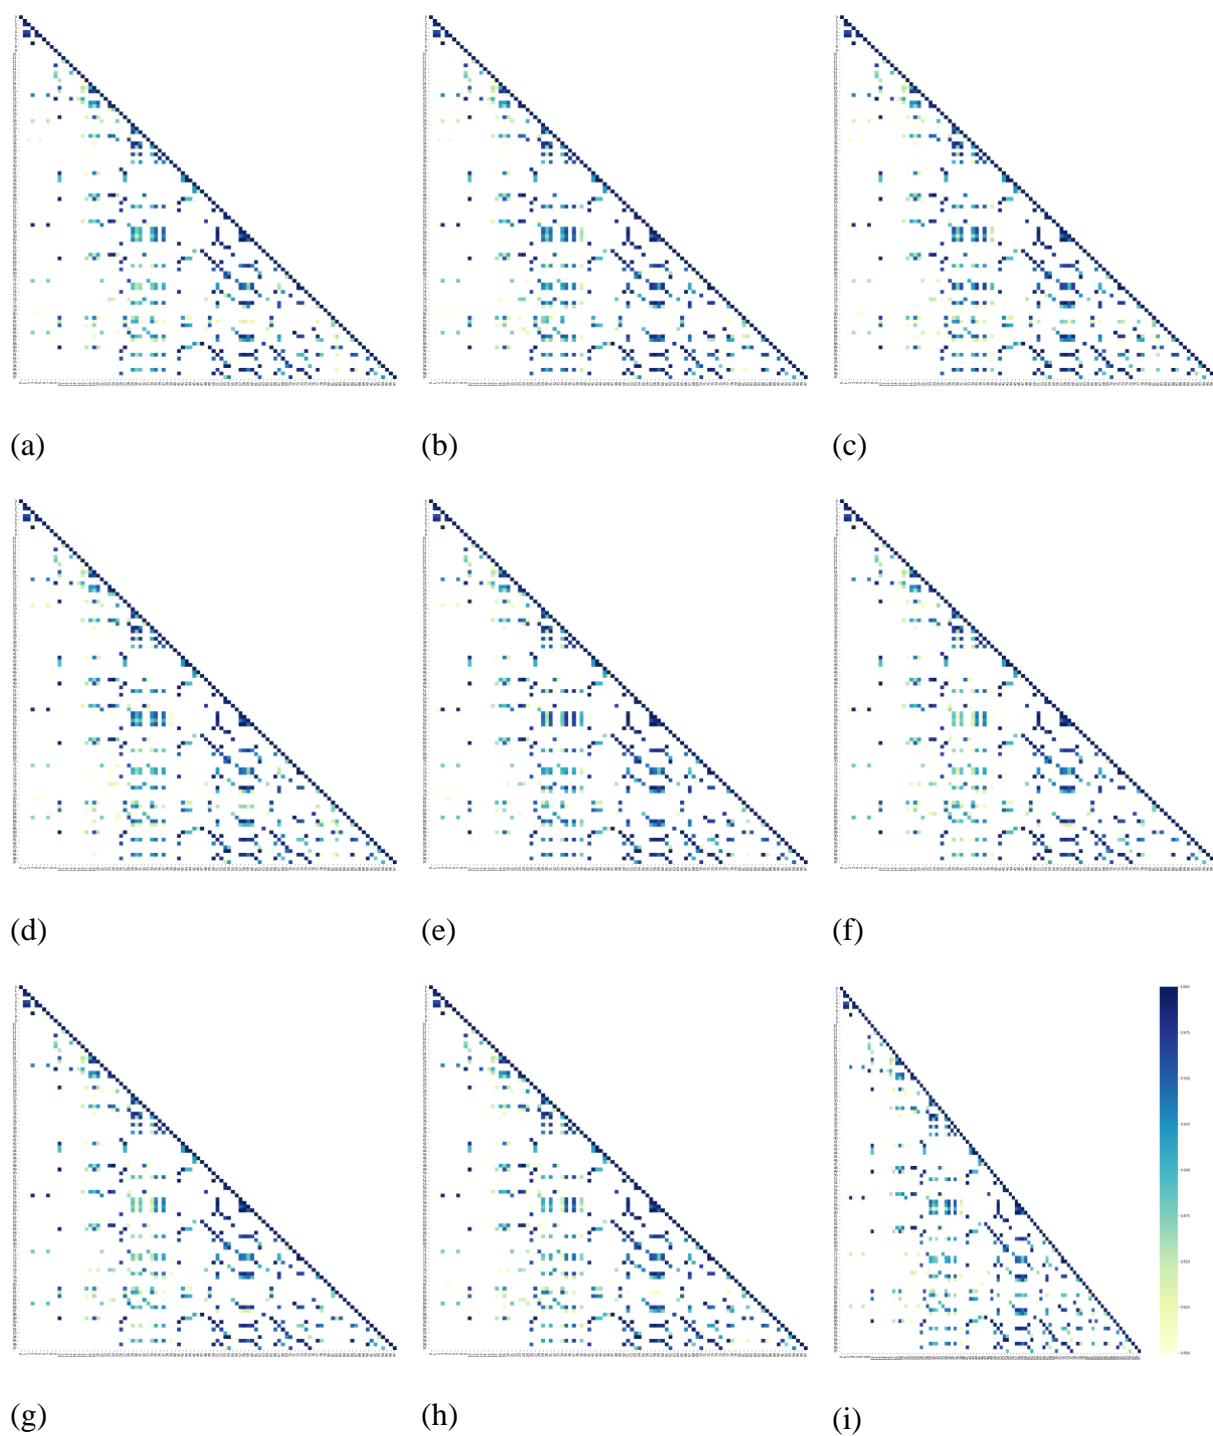

**Figure S9.** Examples of heatmaps of significant PCCs with absolute value greater than 0.8 for T2 maps, at fixed resampling voxel size of 2.4 mm and discretization bin width of 0.49 ms (S9a), 0.50 ms (S9b), 0.51 ms (S9c), 0.52 ms (S9d), 0.53 ms (S9e), 0.54 ms (S9f), 0.55 ms (S9g), 0.56 ms (S9h), and 0.57 ms (S9i). Numerical labels and related radiomic features are reported in Table S1.

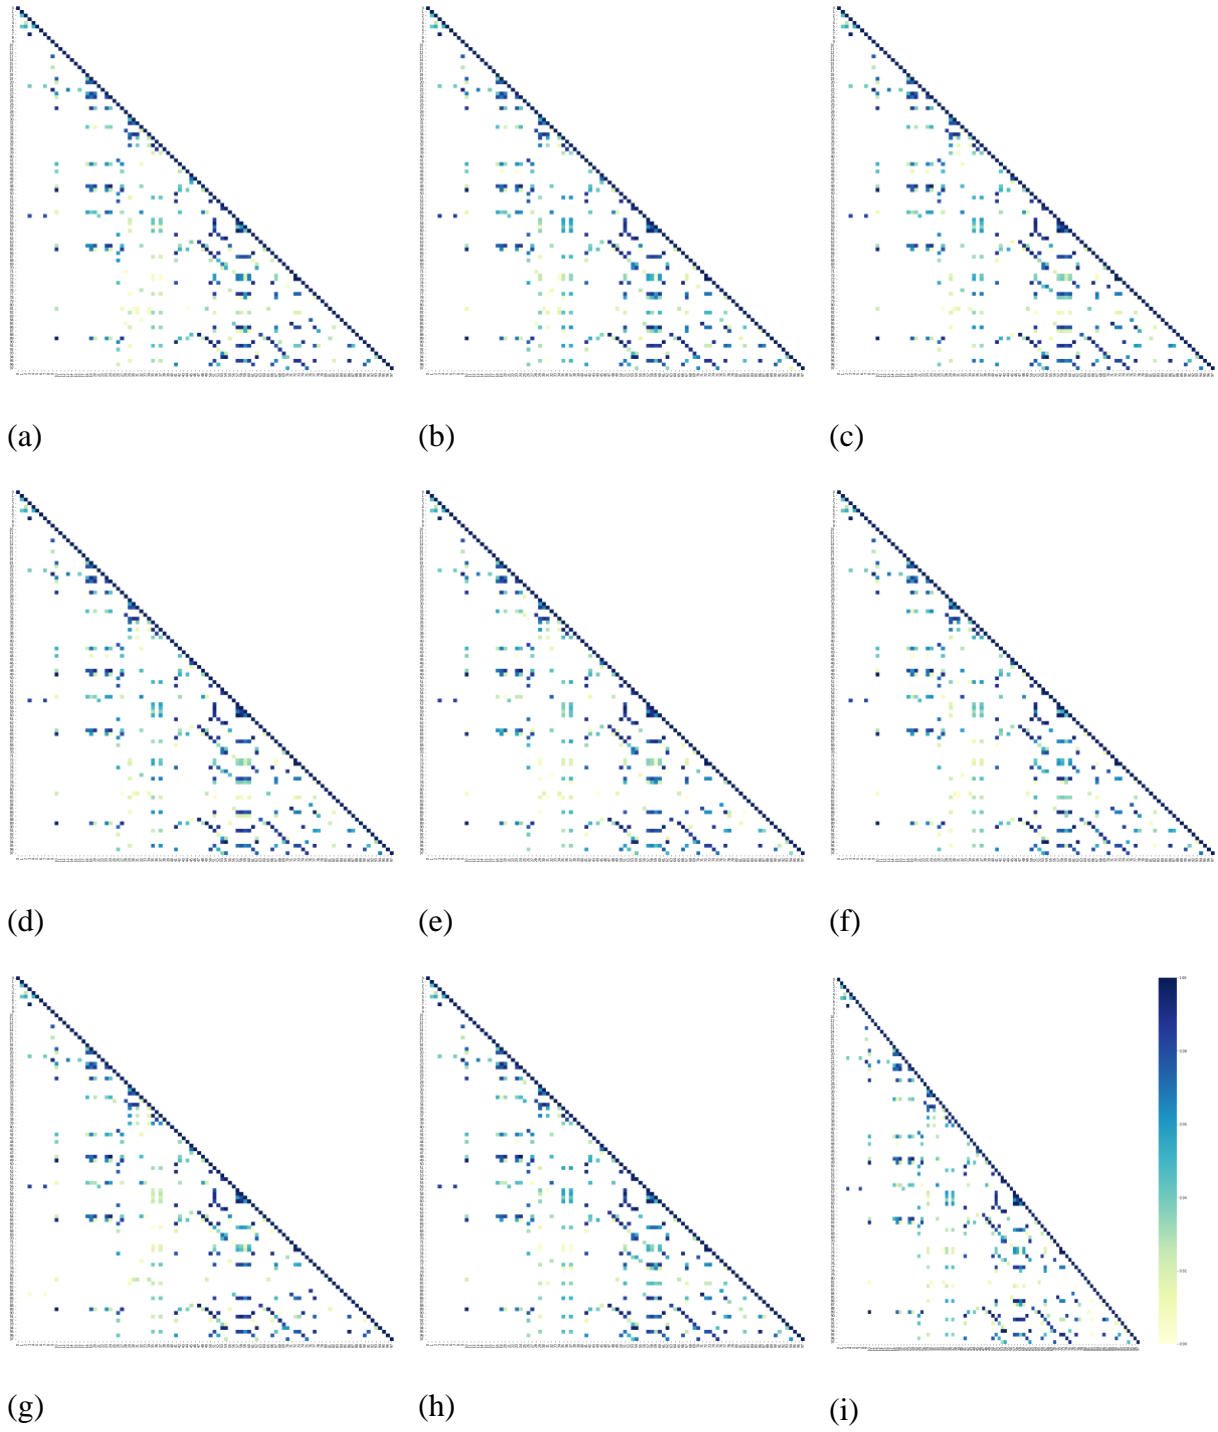

**Figure S10.** Examples of heatmaps of significant SCCs with absolute value greater than 0.9 for T2 maps, at fixed resampling voxel size of 2.1 mm and discretization bin width of 0.49 ms (S10a), 0.50 ms (S10b), 0.51 ms (S10c), 0.52 ms (S10d), 0.53 ms (S10e), 0.54 ms (S10f), 0.55 ms (S10g), 0.56 ms (S10h), and 0.57 ms (S10i). Numerical labels and related radiomic features are reported in Table S1.

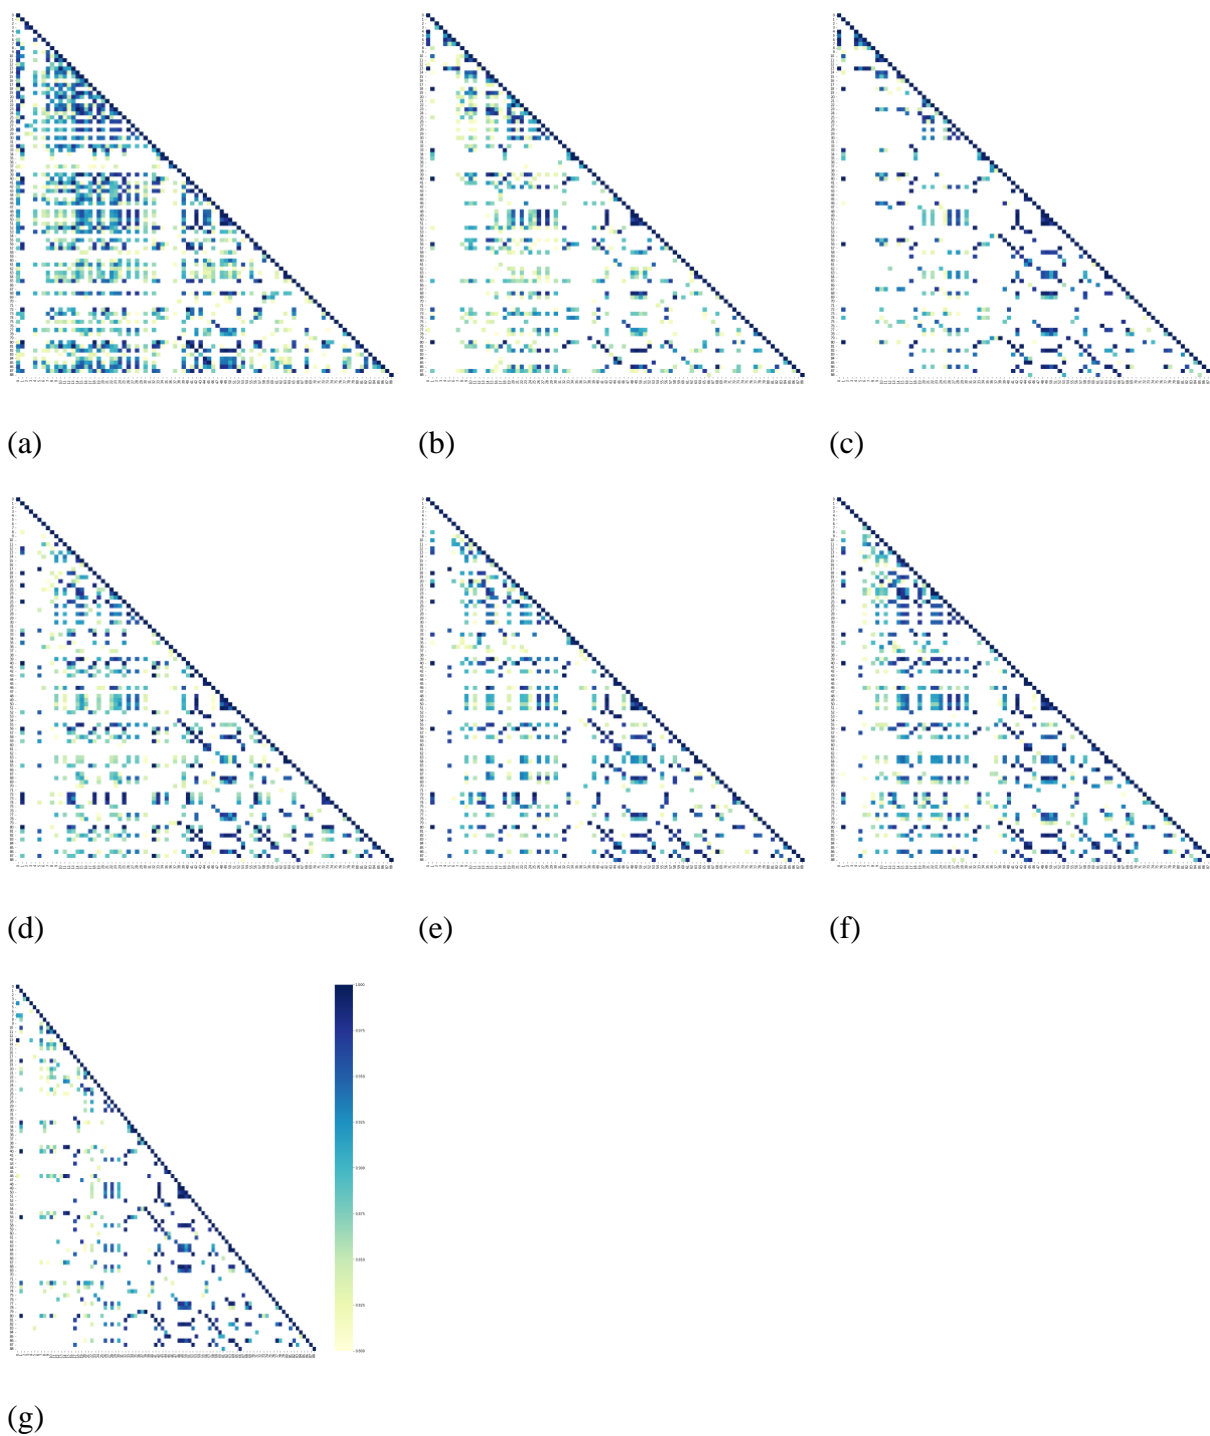

**Figure S11.** Heatmaps of significant PCCs with absolute value greater than 0.8 for T2 maps, at fixed resampling voxel size of 2.1 mm and discretization bin width of 6 ms, with varying filtering: gradient (S11a), square (S11b), square-root (S11c), wavelet-LH (S11d), wavelet-HL (S11e), wavelet-HH (S11f), and wavelet-LL (S11g). HH: horizontal and vertical high-pass filters, HL: horizontal high-pass filter and vertical low-pass filter, LH: horizontal low-pass filter and vertical high-pass filter, LL: horizontal and vertical low-pass filters. Numerical labels and related radiomic features are reported in Table S1.

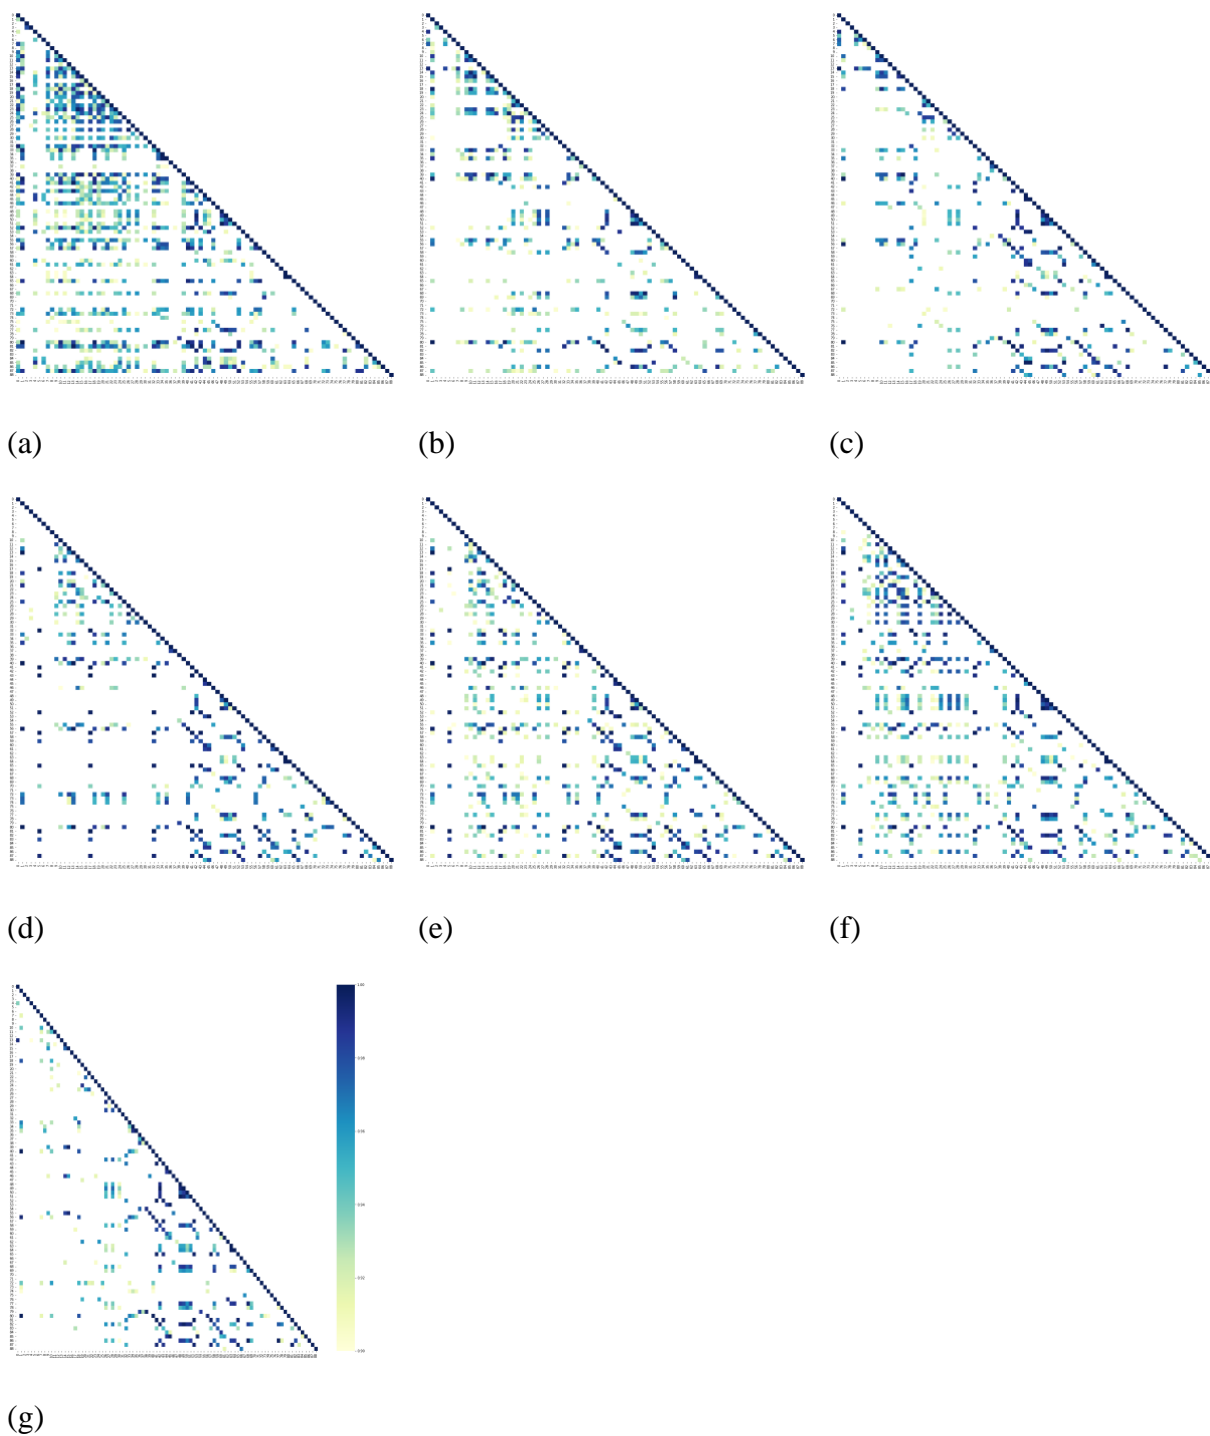

**Figure S12.** Heatmaps of significant SCCs with absolute value greater than 0.9 for T2 maps, at fixed resampling voxel size of 2.1 mm and discretization bin width of 6 ms, with varying filtering: gradient (S12a), square (S12b), square-root (S12c), wavelet-LH (S12d), wavelet-HL (S12e), wavelet-HH (S12f), and wavelet-LL (S12g). HH: horizontal and vertical high-pass filters, HL: horizontal high-pass filter and vertical low-pass filter, LH: horizontal low-pass filter and vertical high-pass filter, LL: horizontal and vertical low-pass filters. Numerical labels and related radiomic features are reported in Table S1.
